# Supplementary material
Source: PubMed Central journal article supplement (PMC9896908)
Supplement: pgac091_supplemental_file.pdf [file pgac091_supplemental_file.pdf]

## SUPPLEMENTAL MATERIAL

### MATERIALS AND METHODS

**ELISA assay to detect S1-specific antibody responses.** The S1-specific binding assays were coated with 100 ng/well of the SARS-CoV-2 spike S1-His Recombinant Protein (Sino Biological) using high-binding 96-well plates (Santa Cruz Biotechnology). After incubation at 4°C overnight, and 1 hr. blocking with 300 µL of 2% sodium casein in 1X PBS, the concentrated BAL samples (with a series of 2-fold dilutions starting from an IgA or IgG concentration of 2 µg/mL) or nasal swab samples, or serially diluted serum samples (4-fold starting from a 1:150 dilution) were applied in duplicate. After incubation at room temperature for 1 hr., the plates were washed four times. Subsequent steps of incubation with HRP-labeled secondary antibody and TMB substrate were followed as described before. For IgG and IgA binding assay, Goat Anti-Monkey IgG (alpha-chain specific)-HRP conjugate (1:5,000 dilutions, *Alpha Diagnostic*) and were used, respectively, as a secondary antibody. Area under the curve, endpoint titer, and half-maximal binding titers were calculated by GraphPad Prism 8 software with sigmoidal nonlinear regression. Dimeric IgA in BAL and nasal swabs was measured using DuoSet ELISA Ancillary Reagent Kit 2 (R&D Systems) as described before (20). 100 ng/well of the SARS-CoV-2 spike S1 protein was coated and blocked. Original BAL samples or nasal swab flow-through from vaccinated and naïve animals were added in duplicate to the plates, followed by adding mouse anti-rhesus J chain [CA1L\_33e1\_A1a3] antibody (1:1000 dilutions, *NIH nonhuman primate reagent resource*), and Goat anti-mouse IgG-HRP conjugate (1:10,000 dilutions, *R&D Systems*). Each step was followed by 1 hr. incubation at room temperature and five washes.

**Intracellular cytokine staining assay.** SARS-CoV-2-specific T cells were measured from BAL and PBMC samples by flow cytometric intracellular cytokine analysis, as previously described (20,

47, 48). Briefly, 2 µg/ml of SARS-CoV-2 S1 overlapping peptide pools (PepTivator SARS-CoV-2 Prot\_S1, and PepTivator SARS-CoV-2 Prot\_S B.1.351 Mutation Pool /WT reference Pool, from *Milteny Biotech Inc.*) was incubated with PBMC and BAL cell samples at 37°C 5%CO<sub>2</sub> overnight in the presence of 0.15 µg/ml of brefeldin A. Negative and positive controls were stimulated with medium-only (no S1 protein) or with cell activation cocktail with PMA (20.25 pM) and ionomycin (335 pM) and 0.15 µg/ml of brefeldin A (Biolegend). Cells were stained with viability dye (Invitrogen) and the following antibody mixtures: PE-Cy7-CD3, BV605-CD4, APC-Cy7-CD8, Alexa Fluor® 700-CD45 were from BD Biosciences, FITC-CD28, Pe-Cy5-CD95, BV711- TNFα, IFNγ-PE or -PerCP, Alexa Fluor® 647-IL4, BV785-IL2, BV421-IL-17A, BV785-CD14, BV421-CD16 were from Biolegend; PE-IL13 was from Miltenyi Biotech. Detailed antibody information is listed in the previous publication (20). Data acquisition and analyses were performed using an LSRII flow cytometer with 4 lasers (BD Bioscience) and FlowJo software (Becton Dickinson).

# Figure S1. Humoral immune responses against SARS-CoV-2 spike protein 1

**(S1) in vaccinated macaques.** (a). the kinetics of S1-specific binding IgG titers in BAL and nasal swabs. The data has been normalized to total IgG in BAL and Nasal swabs separately. Bars indicate geometric means of half-maximal binding titers and means of AUC. (b). S1-specific IgA and dimeric IgA responses in nasal swabs (NS) and BAL samples. The data has been normalized to total IgA in BAL and Nasal swabs separately. Paired t-tests were used to compare the humoral responses after the booster. WA: WA1/2020 D614G SARS-CoV-2 strain; Wu: Wuhan original strain; Beta: B.1.351 variant. The dashed lines indicate the detection limits. Data are shown as mean  $\pm$  SEM. Blue color indicates the S1 protein or the virus from Wuhan or WA strain, and magenta color indicates from beta variant.

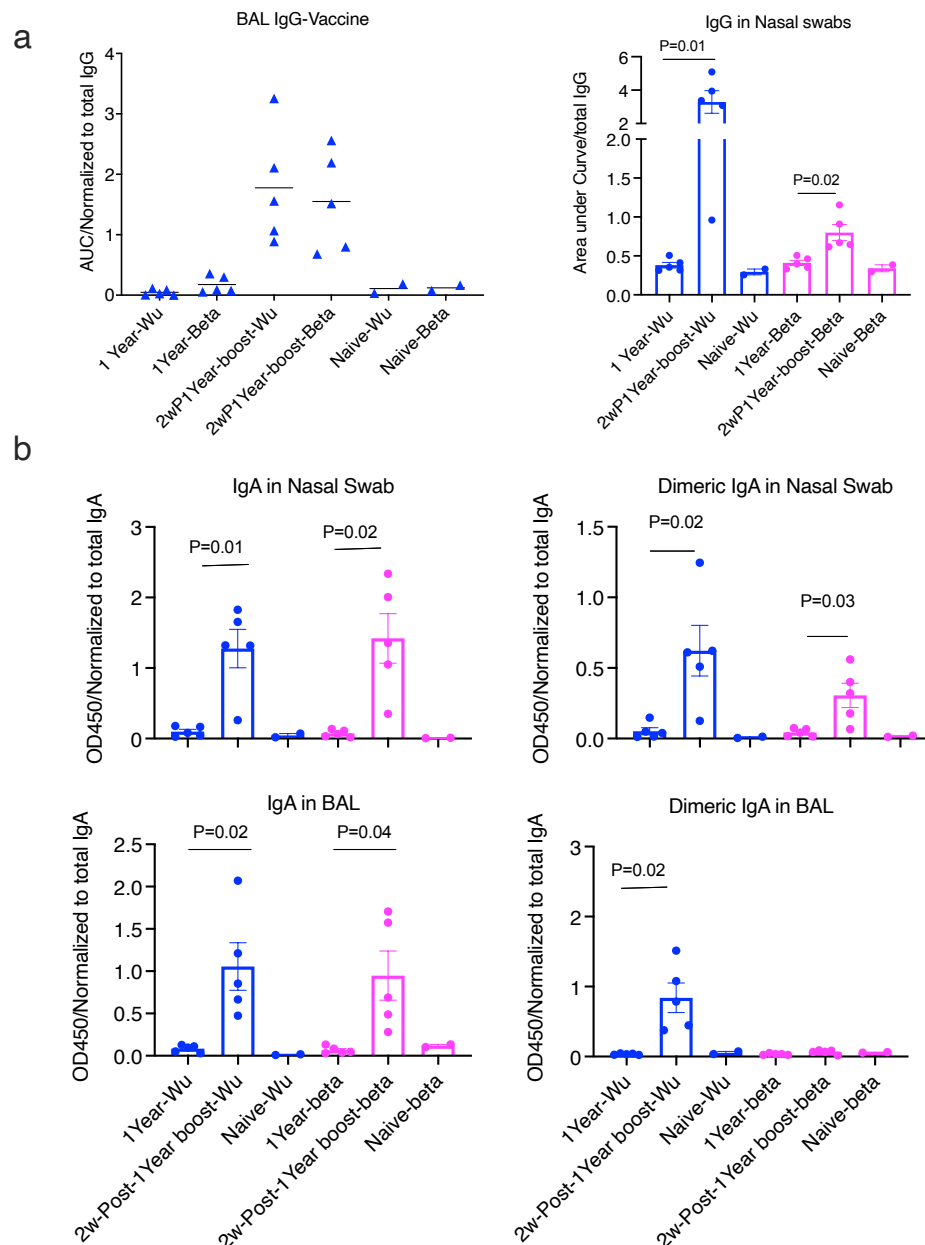

**Figure S2. SARS-CoV-2 spike protein 1 (S1)-specific binding antibody responses against original strain and Omicron variant in serum, BAL and nasal swab samples collected at 2-week post one year booster.** S1-specific IgG, IgA and dimeric IgA responses against original strain (Wu) and Omicron variant in serum and mucosal samples were measured by ELISA. Paired t-tests were used to compare the humoral responses after the booster. Bars indicate geometric means of half-maximal binding titers. Wu: Wuhan original strain; Omicron: B.1.1.529 variant. Data are shown as mean  $\pm$  SEM.

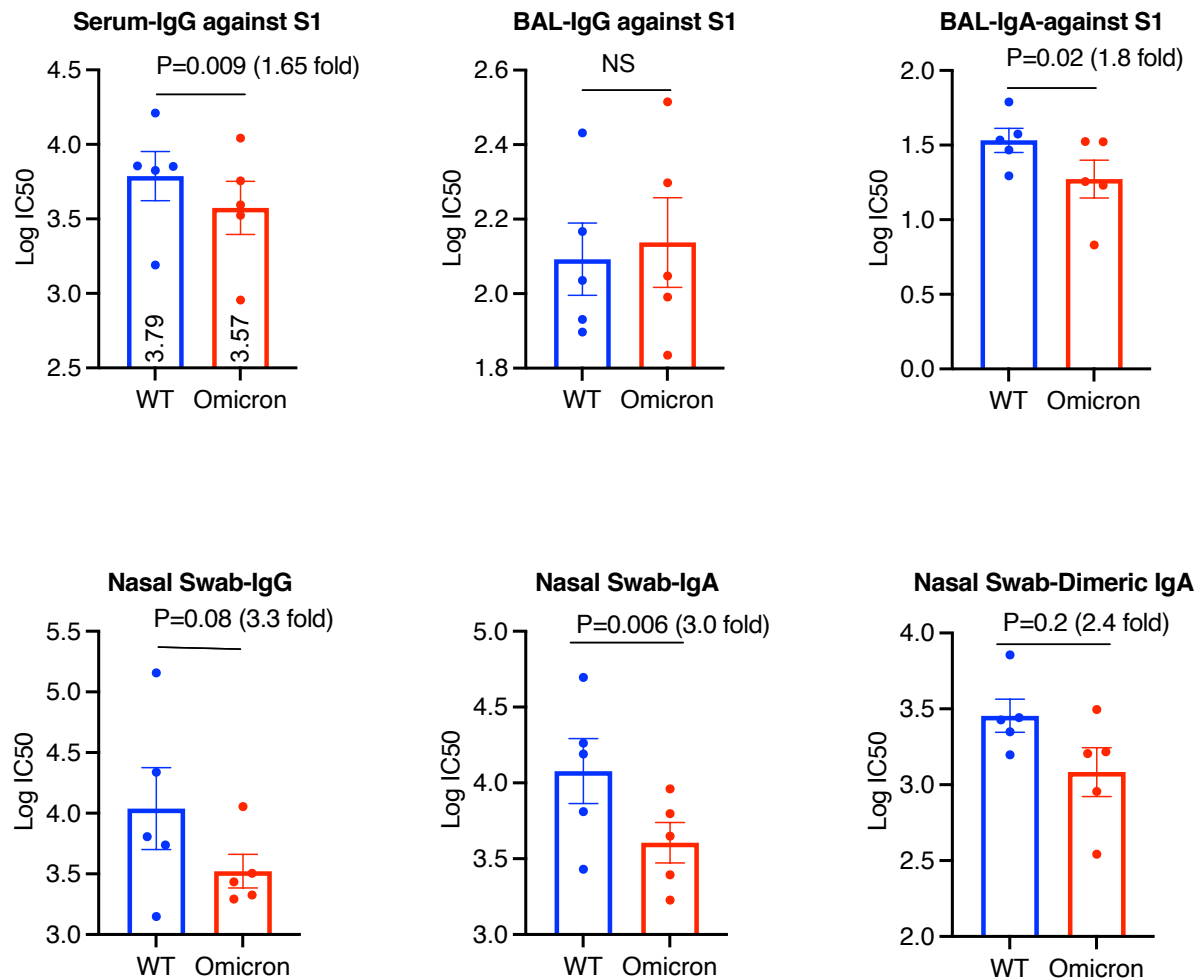

**Figure S3. T helper subsets in PBMC samples of the vaccinated macaques.** The frequencies of IFN $\gamma$ <sup>+</sup>, TNF $\alpha$ <sup>+</sup>, or IL4<sup>+</sup> CD4<sup>+</sup> T cells were stained and measured after stimulation with PMA + ionomycin for 18hrs in PBMCs from different time-points. Flow cytometry plots of IFN $\gamma$ <sup>+</sup>, TNF $\alpha$ <sup>+</sup> CD4<sup>+</sup> T cells were shown below. Wilcoxon tests were used for comparisons.

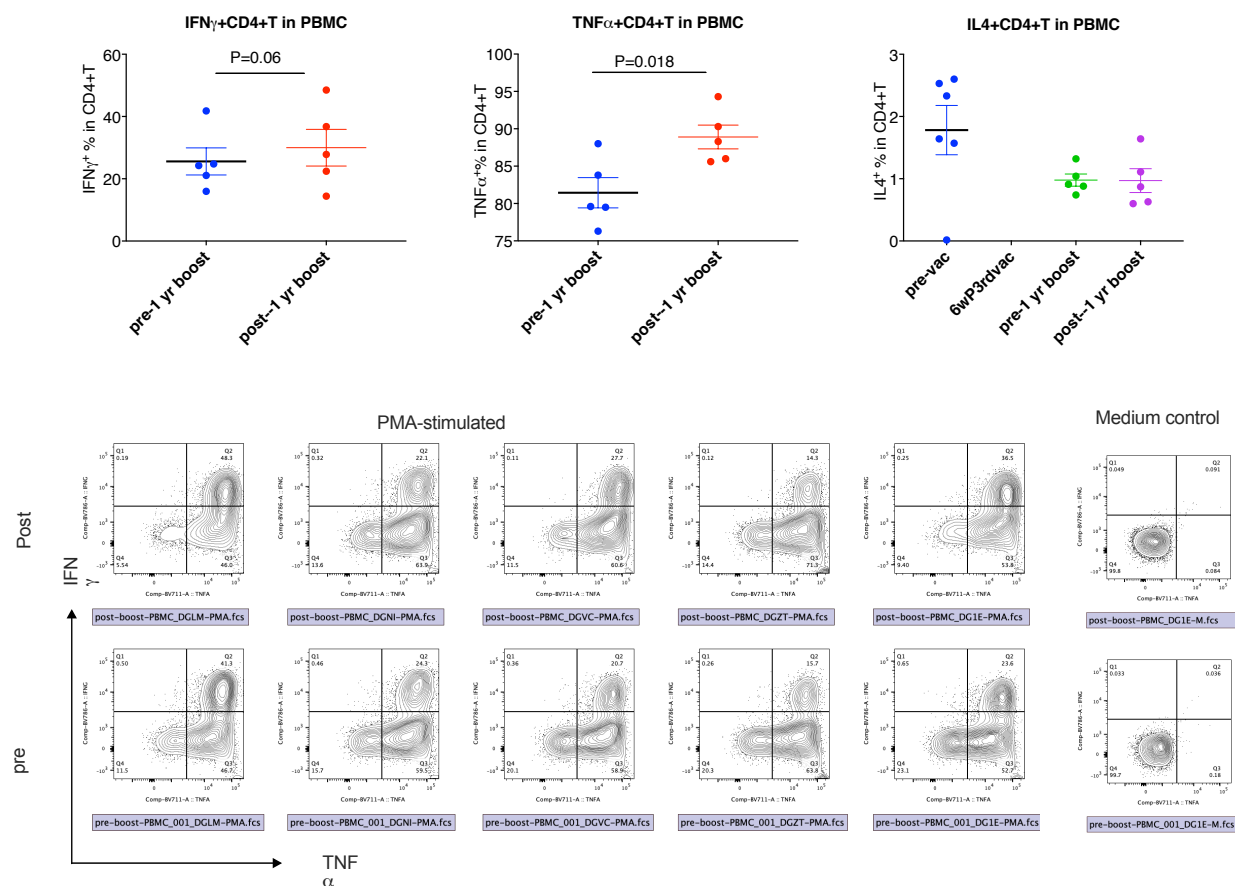

**Table S1. Basic information of the animals enrolled in the study**

| Group   | Animal ID | Sex    | Date birth | Weight |
|---------|-----------|--------|------------|--------|
| Vaccine | DGVC      | Male   | 05/01/2016 | 5.7    |
| Vaccine | DGNi      | Male   | 03/18/2016 | 6.5    |
| Vaccine | DG1E      | Male   | 04/07/2016 | 6.8    |
| Vaccine | DGZT      | Male   | 04/04/2016 | 5.5    |
| Vaccine | DGLM      | Male   | 04/14/2015 | 5.1    |
| Control | 14D044    | Female | 06/19/2014 | 4.07   |
| Control | 14D064    | Female | 06/19/2014 | 4.8    |
| Control | 14D080    | Female | 08/08/2014 | 4.28   |
| Control | 14D065    | Female | 06/29/2014 | 4.68   |
| Control | 14D068    | Female | 07/15/2014 | 4.8    |

**Table S2. Inflammation and immunohistochemistry evaluation of the lung sections (necropsy at day 7 post SARS-CoV-2 challenge)**

| Animal ID | Group   | H&E (Lc; Rm; Rc) | COVID-19 IHC (Lc; Rm; Rc) |
|-----------|---------|------------------|---------------------------|
| DGVC      | Vaccine | +/-; +/-; +/-    | -; -; -                   |
| DGNi      | Vaccine | +/-; +/-; +      | -; -; -                   |
| DG1E      | Vaccine | +/-; +/-; +/-    | -; -; -                   |
| DGZT      | Vaccine | +; +; +          | -; -; -                   |
| DGLM      | Vaccine | +/-; +/-; +/-    | -; -; -                   |
| 14D044    | Control | +/-; +; +        | -; -; -                   |
| 14D064    | Control | ++; +; ++        | -; -; +                   |
| 14D080    | Control | +/-; +; ++       | +; -; +/-                 |
| 14D065    | Control | +; +; ++         | -; -; +/-                 |
| 14D068    | Control | +/-; +; +        | -; +/-; -                 |

H&E (inflammation) severity scale: normal= - (0); <10% (tissue affected) = +/- (1); >10-<25% = + (2); >26-<50% = ++ (3); >50%= +++ (4). Three parts of the lung lobes: Left caudal [Lc], Right Middle [Rm], and Right caudal [Rc].

IHC (COVID + foci)

Scoring: - = no SARS-CoV-2 Ag detected; +/- = rare- occasional; + = occasional-multiple; ++ = multiple- numerous (foci often larger); +++ = numerous
